# Supplementary material for: Genetic polymorphisms in pre-miRNAs predict the survival of non-small-cell lung cancer in Chinese population: a cohort study and a meta-analysis
Source: PubMed Central journal article supplement (PMC5652828; doi:10.18632/oncotarget.20276), 2017-08-16
Supplement: oncotarget-08-77963-s001.pdf [file oncotarget-08-77963-s001.pdf]

## Genetic polymorphisms in pre-miRNAs predict the survival of non-small-cell lung cancer in Chinese population: a cohort study and a meta-analysis

### SUPPLEMENTARY MATERIALS

**Supplementary Table 1: The basic characteristics between lost to follow-up group and follow-up group**

| variables                | Lost to follow-up group | Follow-up group   | <i>p</i> |
|--------------------------|-------------------------|-------------------|----------|
| Age ( $\bar{X} \pm SD$ ) | 58.31 $\pm$ 10.84       | 55.96 $\pm$ 11.64 | 0.474    |
| Histological type        |                         |                   |          |
| AD                       | 15                      | 237               | 0.844    |
| SQU                      | 8                       | 164               |          |
| others                   | 3                       | 53                |          |
| Clinical Stage           |                         |                   |          |
| I                        | 7                       | 95                | 0.710    |
| II                       | 4                       | 56                |          |
| III                      | 14                      | 263               |          |
| IV                       | 1                       | 40                |          |

**Supplementary Table 2: The results for stratified analysis.** See Supplementary\_Table\_2
